# Supplementary material
Source: PubMed Central journal article supplement (PMC4425833)
Supplement: supp_kwu316_kwu316supp.pdf [file supp_kwu316_kwu316supp.pdf]

## Vart et al. Web Material

### Mediators of the Association Between Low Socioeconomic Status and Chronic Kidney Disease in the United States

- 1) **Web Table 1:** Association of possible mediators with low socioeconomic status in the overall population and in each racial/ethnic group, based on data from the National Health and Nutrition Examination Survey, 2007–2008 and 2009–2010
- 2) **Web Table 2:** Natural direct and indirect effects (IEs) on the odds ratio scale of the effect of socioeconomic status (SES) on low glomerular filtration rate via health-related behaviors, comorbid conditions, and factors of health-care access, National Health and Nutrition Examination Survey, 2007–2008 and 2009–2010

**Web Table 1:** Association of possible mediators with low socioeconomic status overall and in each racial/ethnic group, based on data from the National Health and Nutrition Examination Survey, 2007–2008 and 2009–2010<sup>a</sup>

|                                 | Overall<br>(n = 9,823) |            | Non-Hispanic Whites<br>(n = 5,244) |            | African Americans<br>(n = 1,942) |            | Mexican Americans<br>(n = 1,932) |            | Others<br>(n = 1,688) |             |
|---------------------------------|------------------------|------------|------------------------------------|------------|----------------------------------|------------|----------------------------------|------------|-----------------------|-------------|
|                                 | OR                     | 95% CI     | OR                                 | 95% CI     | OR                               | 95% CI     | OR                               | 95% CI     | OR                    | 95% CI      |
| <b>Health-related behaviors</b> |                        |            |                                    |            |                                  |            |                                  |            |                       |             |
| Smoking                         | 3.31                   | 2.87, 3.82 | 1.24                               | 1.03, 1.45 | 4.33                             | 3.04, 6.17 | 1.30                             | 0.91, 1.94 | 1.82                  | 1.01, 3.27  |
| Alcohol intake (high)           | 2.62                   | 2.25, 3.06 | 1.21                               | 1.01, 1.43 | 1.83                             | 1.27, 2.64 | 1.45                             | 0.96, 1.98 | 1.61                  | 0.90, 2.91  |
| Physical inactivity             | 2.87                   | 2.58, 3.20 | 1.84                               | 1.50, 2.27 | 2.91                             | 1.99, 3.88 | 2.05                             | 1.47, 2.69 | 2.33                  | 1.38, 3.85  |
| Sedentary time (high)           | 2.55                   | 2.07, 3.16 | 1.20                               | 1.01, 1.41 | 1.27                             | 1.01, 1.61 | 1.95                             | 1.34, 2.86 | 3.03                  | 1.81, 5.00  |
| Diet                            | 1.34                   | 1.12, 1.62 | 1.50                               | 1.17, 1.91 | 1.31                             | 1.02, 1.63 | 1.41                             | 1.95, 2.11 | 1.97                  | 1.02, 2.86  |
| <b>Comorbid conditions</b>      |                        |            |                                    |            |                                  |            |                                  |            |                       |             |
| Diabetes                        | 1.50                   | 1.30, 1.74 | 1.73                               | 1.41, 2.12 | 1.61                             | 1.02, 2.21 | 1.72                             | 1.09, 2.14 | 1.87                  | 1.18, 2.49  |
| Hypertension                    | 1.38                   | 1.22, 1.57 | 1.41                               | 1.18, 1.69 | 1.58                             | 1.02, 2.11 | 1.47                             | 1.02, 1.95 | 1.59                  | 1.11, 2.12  |
| Obesity                         | 1.32                   | 1.19, 1.51 | 1.21                               | 1.03, 1.41 | 1.52                             | 1.04, 2.00 | 1.39                             | 1.01, 1.89 | 1.54                  | 1.06, 2.00  |
| Abdominal obesity               | 1.37                   | 1.22, 1.54 | 1.23                               | 1.05, 1.42 | 1.55                             | 1.05, 2.02 | 1.44                             | 1.03, 1.91 | 1.54                  | 1.07, 2.01  |
| Hypercholesterolemia            | 1.24                   | 1.07, 1.42 | 1.22                               | 1.04, 1.42 | 1.49                             | 1.00, 1.99 | 1.51                             | 1.03, 2.05 | 1.30                  | 0.89, 1.56  |
| <b>Health-care access</b>       |                        |            |                                    |            |                                  |            |                                  |            |                       |             |
| Health insurance                | 3.36                   | 2.60, 4.33 | 1.15                               | 1.00, 1.34 | 2.13                             | 1.25, 3.27 | 1.67                             | 1.01, 2.54 | 4.45                  | 1.86, 10.68 |
| Routine health-care visits      | 4.94                   | 3.64, 6.73 | 1.47                               | 1.23, 1.75 | 2.79                             | 1.47, 4.40 | 1.72                             | 1.03, 2.54 | 3.76                  | 2.40, 5.87  |

Abbreviations: CI, confidence interval; OR, odds ratio.

<sup>a</sup> Adjusted for age and sex.

**Web Table 2:** Natural direct and indirect effects on the odds ratio scale of the effect of socioeconomic status on low estimated glomerular filtration rate (<60 mL/min/1.73 m<sup>2</sup>) via potential mediators, National Health and Nutrition Examination Survey, 2007–2008 and 2009–2010<sup>a</sup>

| Potential Mediator                    | Odds Ratio | 95% CI     | Mediation, % | 95% CI |
|---------------------------------------|------------|------------|--------------|--------|
| <b>Health-related behaviors</b>       |            |            |              |        |
| Direct effect                         | 1.71       | 1.38, 2.21 | 83           | 62, 94 |
| IE—Smoking (current)                  | 1.05       | 1.02, 1.08 | 7            | 3, 11  |
| IE—Alcohol intake (high) <sup>b</sup> | 1.03       | 1.01, 1.06 | 4            | 1, 8   |
| IE—Physical activity (inactive)       | 1.03       | 1.01, 1.05 | 4            | 1, 7   |
| IE—Sedentary time (high) <sup>b</sup> | 1.01       | 0.98, 1.05 | 3            | –1, 7  |
| IE—Diet (unhealthy)                   | 0.99       | 0.94, 1.04 | 1            | –3, 6  |
| IE—Together                           | 1.11       | 1.06, 1.16 | 17           | 10, 24 |
| Total effect                          | 1.91       | 1.39, 2.67 |              |        |
| <b>Comorbid conditions</b>            |            |            |              |        |
| Direct effect                         | 1.58       | 1.12, 2.23 | 71           | 59, 85 |
| IE—Diabetes                           | 1.09       | 1.04, 1.14 | 12           | 5, 19  |
| IE—Hypertension                       | 1.05       | 1.02, 1.09 | 6            | 3, 9   |
| IE—Obesity                            | 1.03       | 1.01, 1.06 | 4            | 1, 7   |
| IE—Abdominal obesity                  | 1.04       | 1.01, 1.07 | 4            | 1, 7   |
| IE—Hypercholesterolemia               | 1.03       | 1.00, 1.06 | 3            | 1, 6   |
| IE—Together                           | 1.25       | 1.16, 1.34 | 29           | 17, 41 |
| Total effect                          | 1.91       | 1.39, 2.67 |              |        |
| <b>Health-care access</b>             |            |            |              |        |
| Direct effect                         | 1.77       | 1.41, 2.17 | 92           | 85, 99 |
| IE—Health insurance                   | 1.04       | 1.01, 1.09 | 4            | 1, 8   |
| IE—Health care visits                 | 1.04       | 1.00, 1.08 | 4            | 1, 7   |
| IE—Together                           | 1.08       | 1.04, 1.14 | 8            | 2, 14  |
| Total effect                          | 1.91       | 1.39, 2.67 |              |        |

Abbreviations: CI, confidence interval; IE, indirect effect; SES, socioeconomic status.

<sup>a</sup> Results are shown for high SES vs. low SES.

<sup>b</sup> Mediation via high alcohol intake and high sedentary time.
